# Supplementary material for: Facile synthesis of nickel and cobalt oxide-integrated 3-D porous nitrogen-doped carbon derived from Psidium guajava (PNDC/NiCo 2 O 4 ) for supercapacitor applications
Source: Royal Society of Chemistry journal article supplement (doi:10.1039/d4nj05512h), 2025-01-01
Supplement: d4nj05512h1.pdf [file d4nj05512h1.pdf]

## Supplementary Information

### **Facile Synthesis of Nickel and Cobalt Oxide integrated 3-D Porous Nitrogen-Doped Carbon derived from *Psidium guajava* (PNDC/NiCo<sub>2</sub>O<sub>4</sub>) for supercapacitor application**

**Gaurav Mukherjee<sup>a</sup>, Asha Raveendran<sup>a</sup>, Chuanxiang Chen<sup>b</sup>, Masoom Raza  
Siddiqui<sup>c</sup>, Saikh Mohammad Wabaidur<sup>c</sup>, Ragupathy Dhanusuraman<sup>a,d\*</sup>**

*<sup>a</sup>Nano Electrochemistry Lab (NEL), Department of Chemistry, National Institute of  
Technology Puducherry, Karaikal - 609609, India*

*<sup>b</sup>School of Environmental and Chemical Engineering, Jiangsu University of Science and  
Technology, 212100 Zhenjiang, China*

*<sup>c</sup>Chemistry Department, College of Science, King Saud University, Riyadh 11451, Saudi  
Arabia*

*<sup>a,d</sup> Nano Electrochemistry Laboratory (NEL), Central Instrumentation Facility (CIF), School  
of Physical, Chemical and Applied Sciences, Pondicherry University, Puducherry - 605014,  
India*

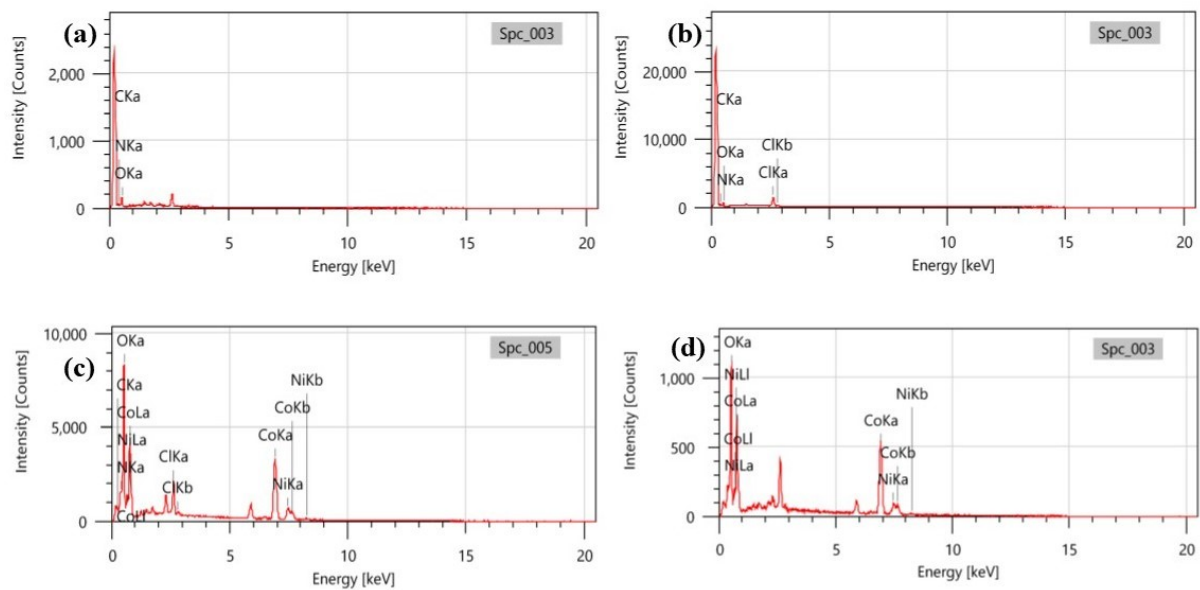

**Figure S1:** EDAX spectra of (a)AC-CO<sub>3</sub>, (b) AC-Cl, (c) AC-ClMO, (d) MO

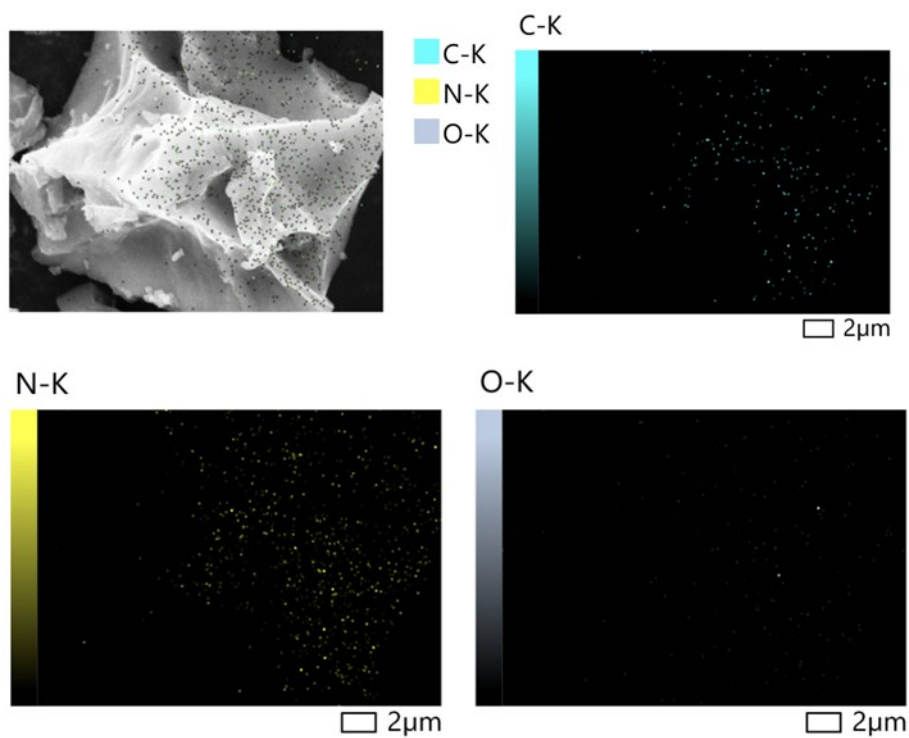

**Figure S2:** Elemental mapping of AC-CO<sub>3</sub>

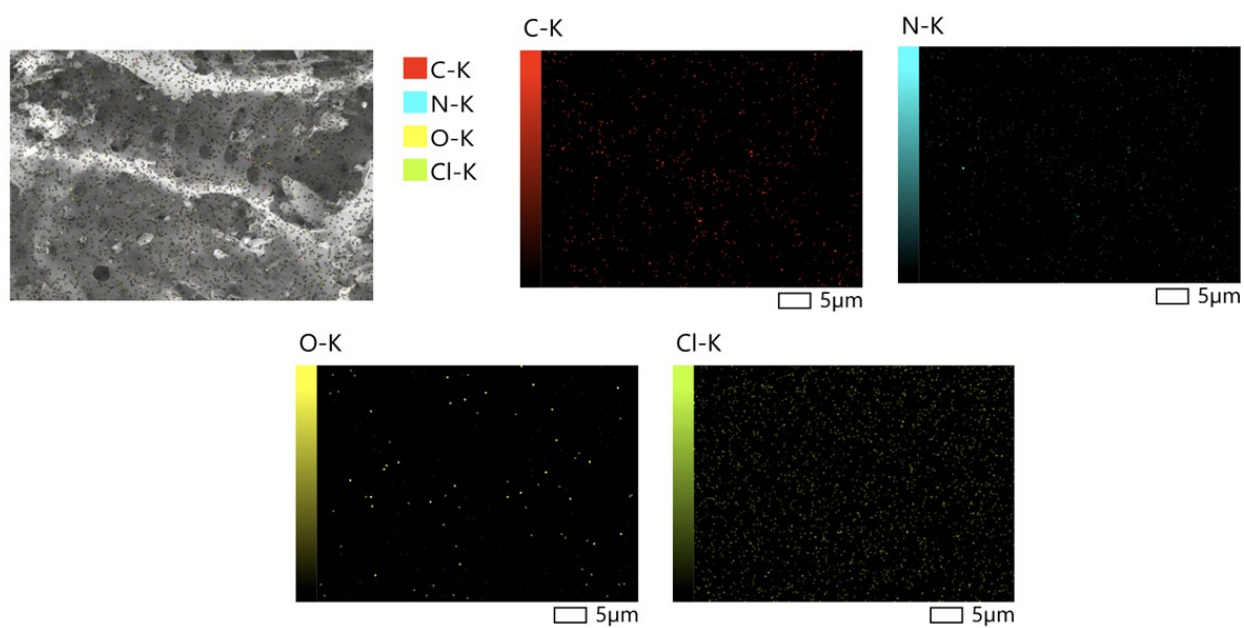

**Figure S3:** Elemental mapping of AC-Cl

**Figure S4:** Elemental mapping of AC-ClMO

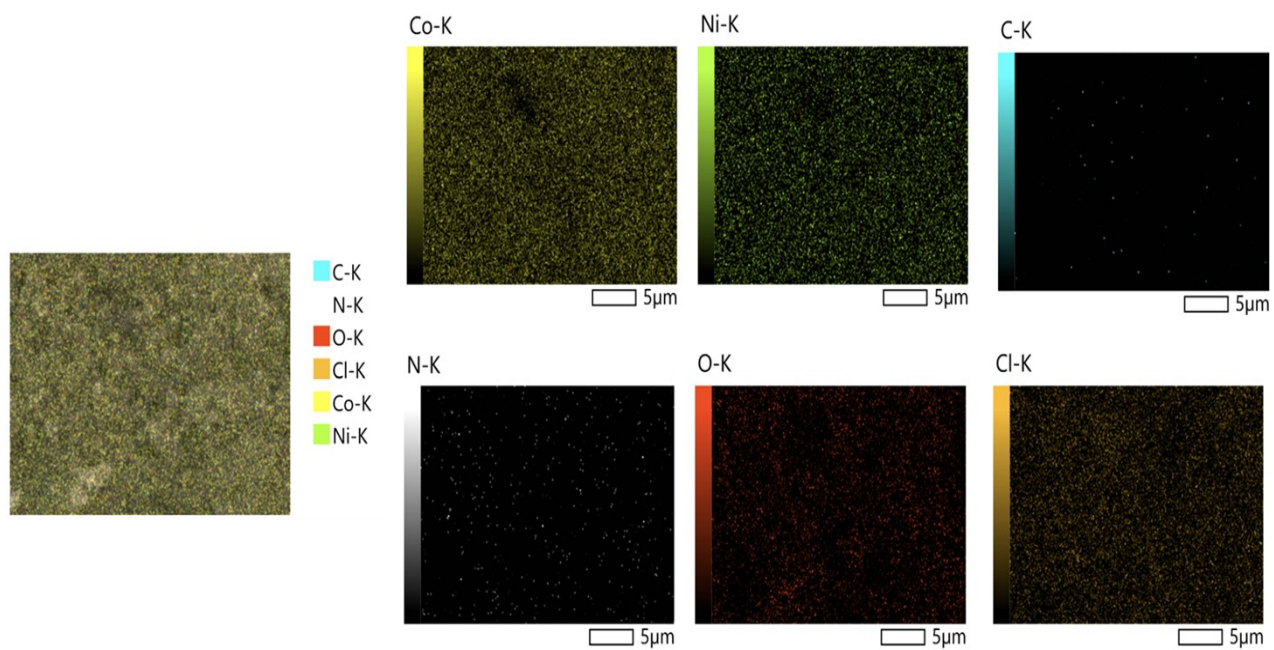

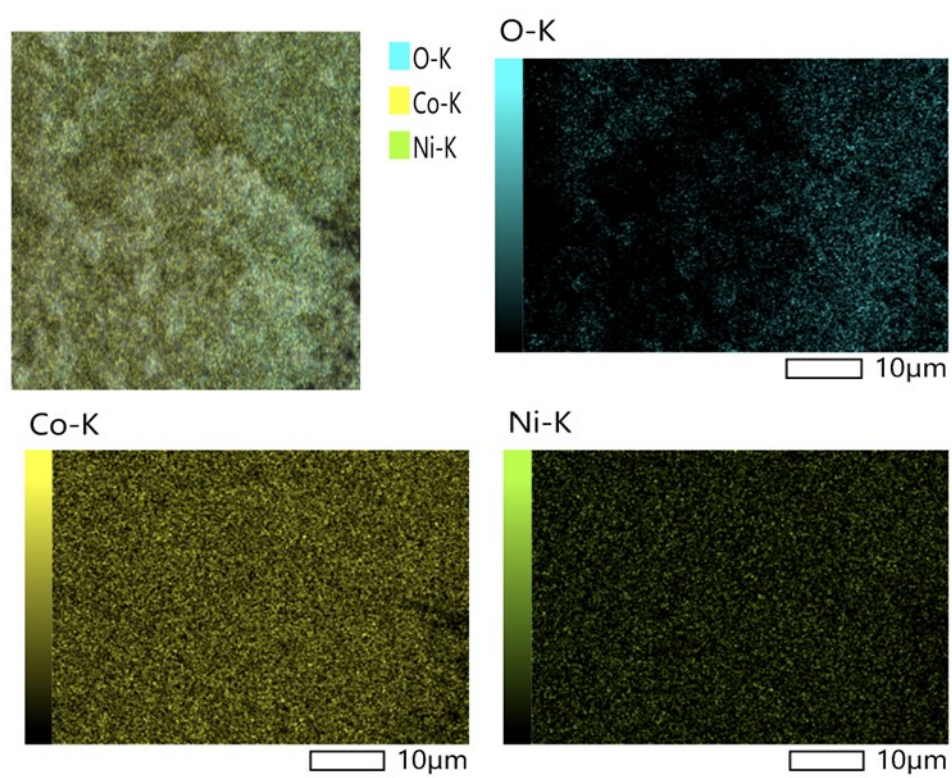

**Figure S5:** Elemental mapping of MO

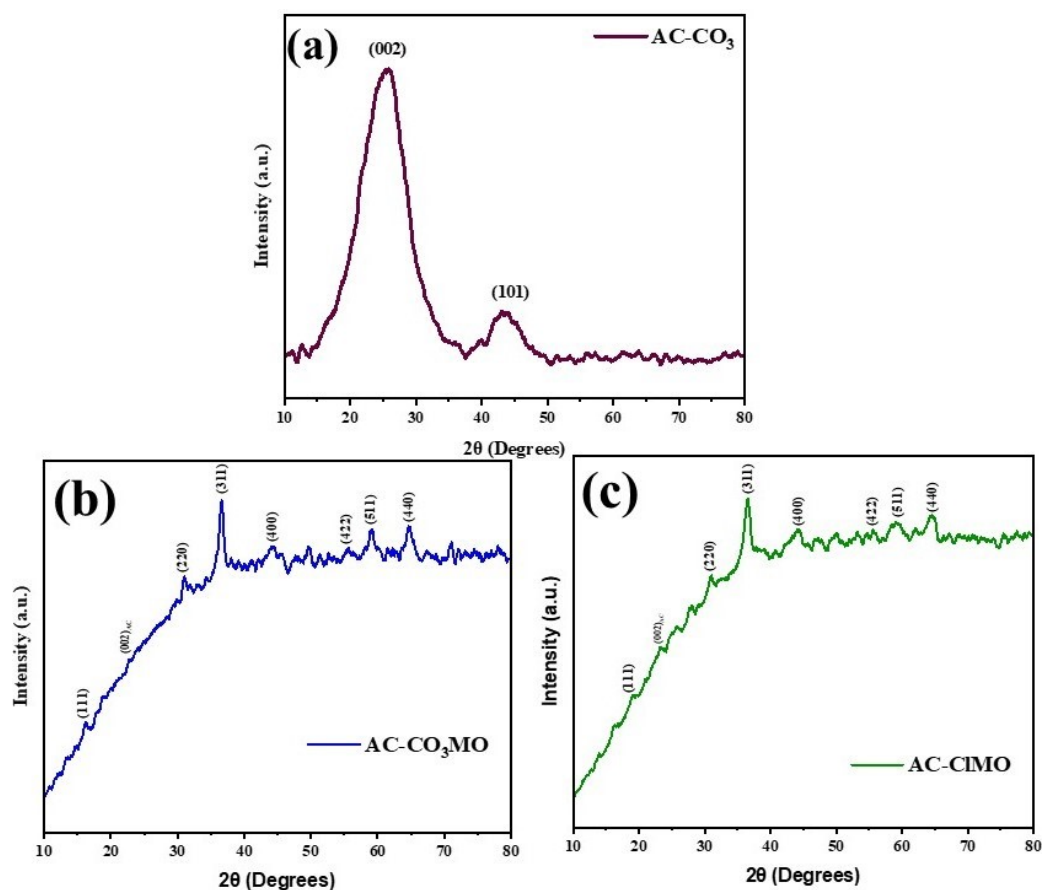

**Figure S6:** XRD Spectra of: (a) AC-CO<sub>3</sub>; (b) AC-CO<sub>3</sub>MO; (c) AC-CIMO

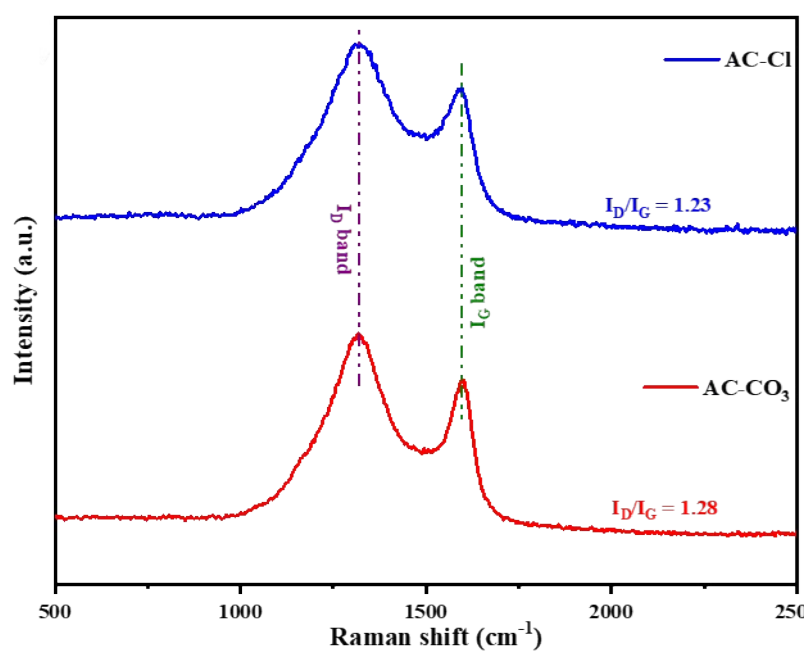

**Figure S7:** Raman Spectra of Nitrogen-Doped Biochar (AC-CO<sub>3</sub> and AC-Cl)

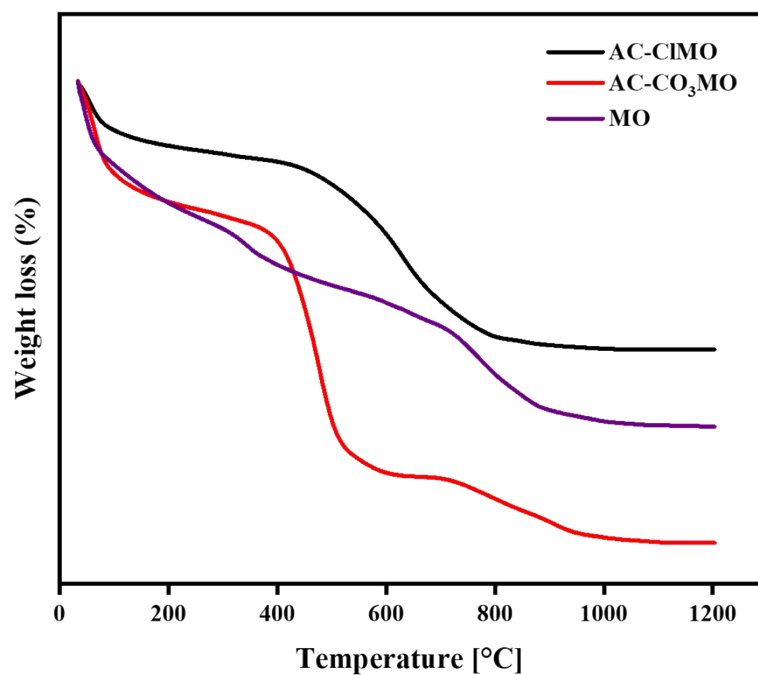

**Figure S8:** TGA curves of AC-CO<sub>3</sub>MO ,AC-CIMO and MO

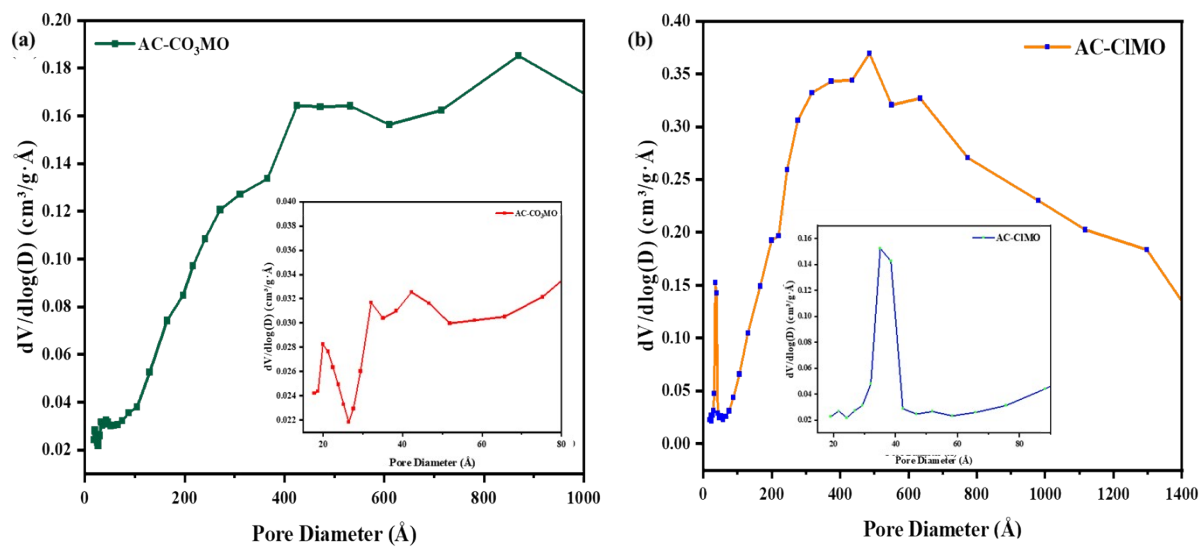

**Figure S9:** BJH plot: pore size distribution plot for (inset showing magnified view) (a) AC-CO<sub>3</sub>MO, (b) AC-CIMO



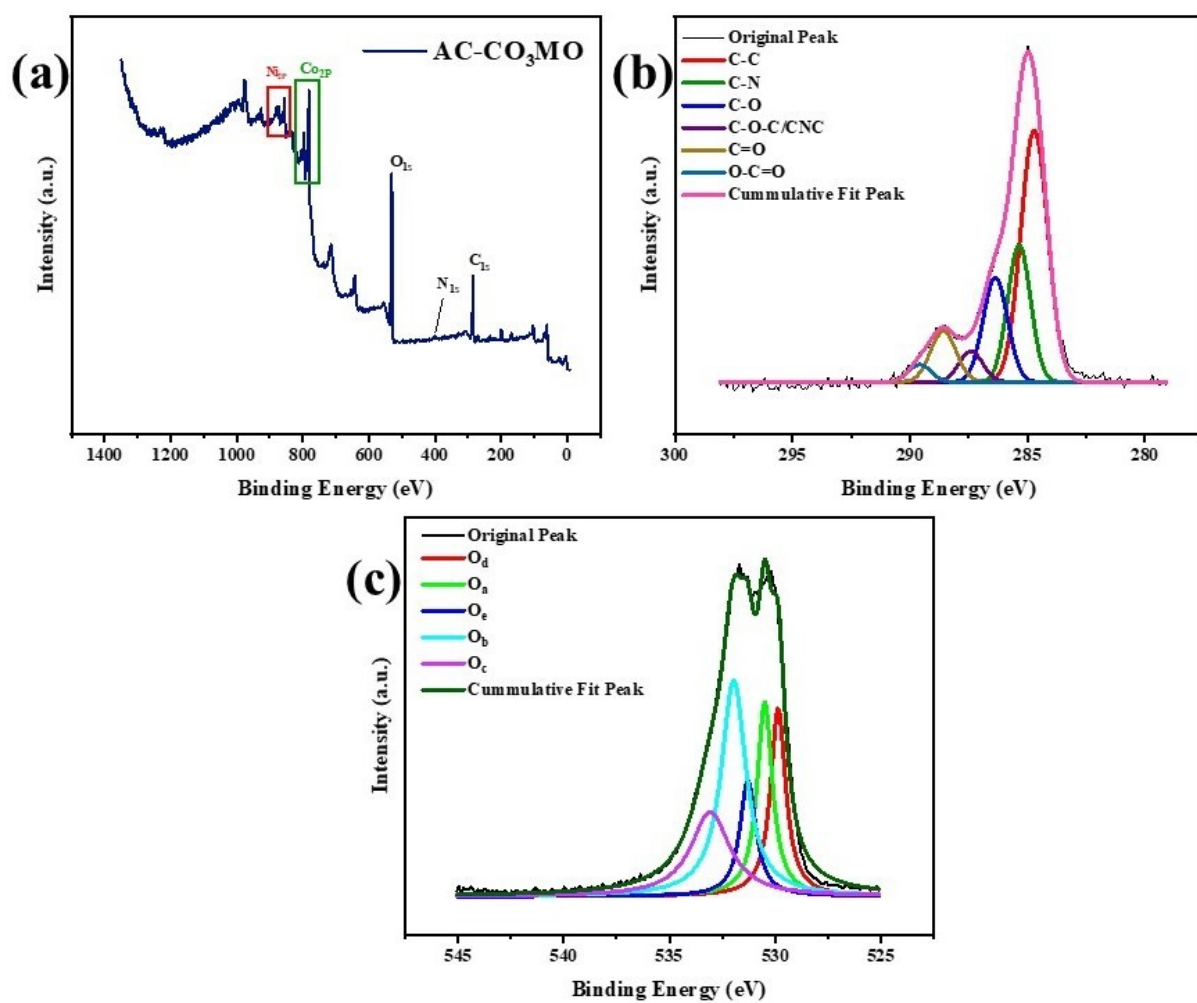

**Figure S10 :** XPS (a) survey and spectra of AC-CO<sub>3</sub>MO ( (b)C<sub>1s</sub> core level, (b) O<sub>1s</sub> core level

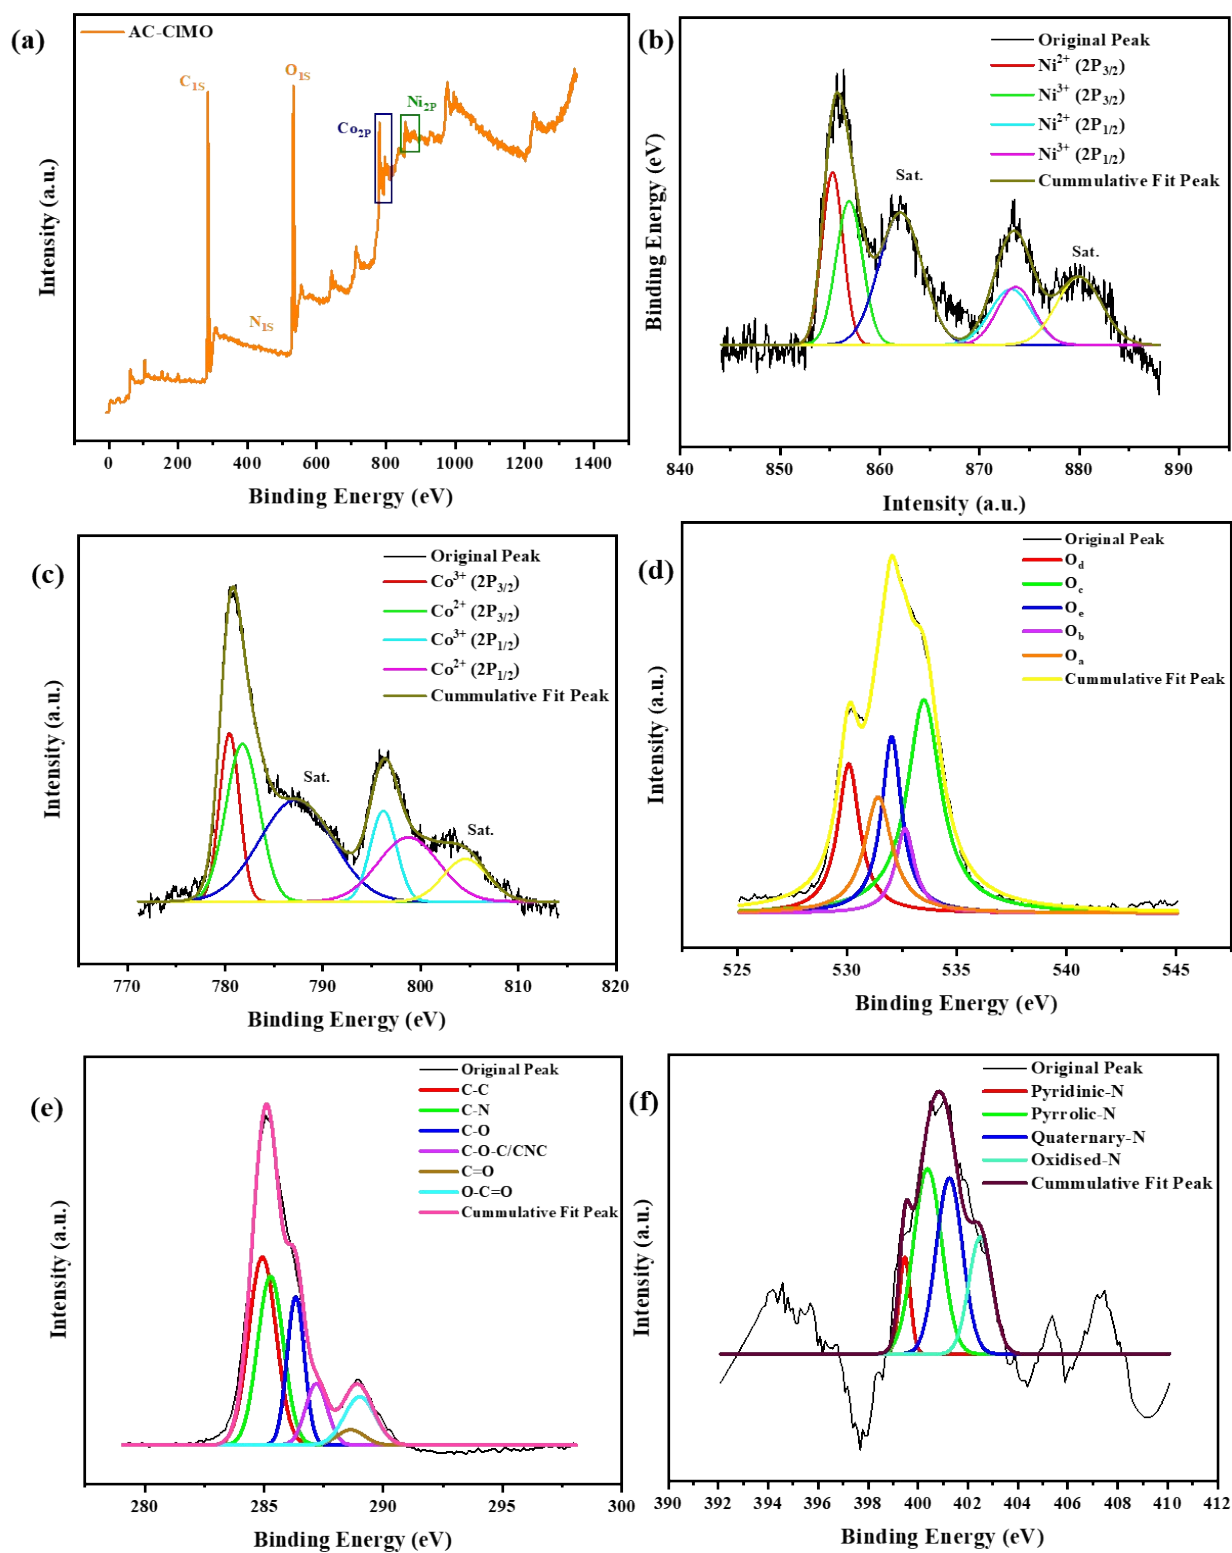

**Figure S11 :** XPS (a) survey and spectra of AC-CIMO (b) Ni<sub>2p</sub> core level, (c) Co<sub>2p</sub> core level (d)C<sub>1s</sub> core level, (e) O<sub>1s</sub> core level (f) N<sub>1s</sub> core level



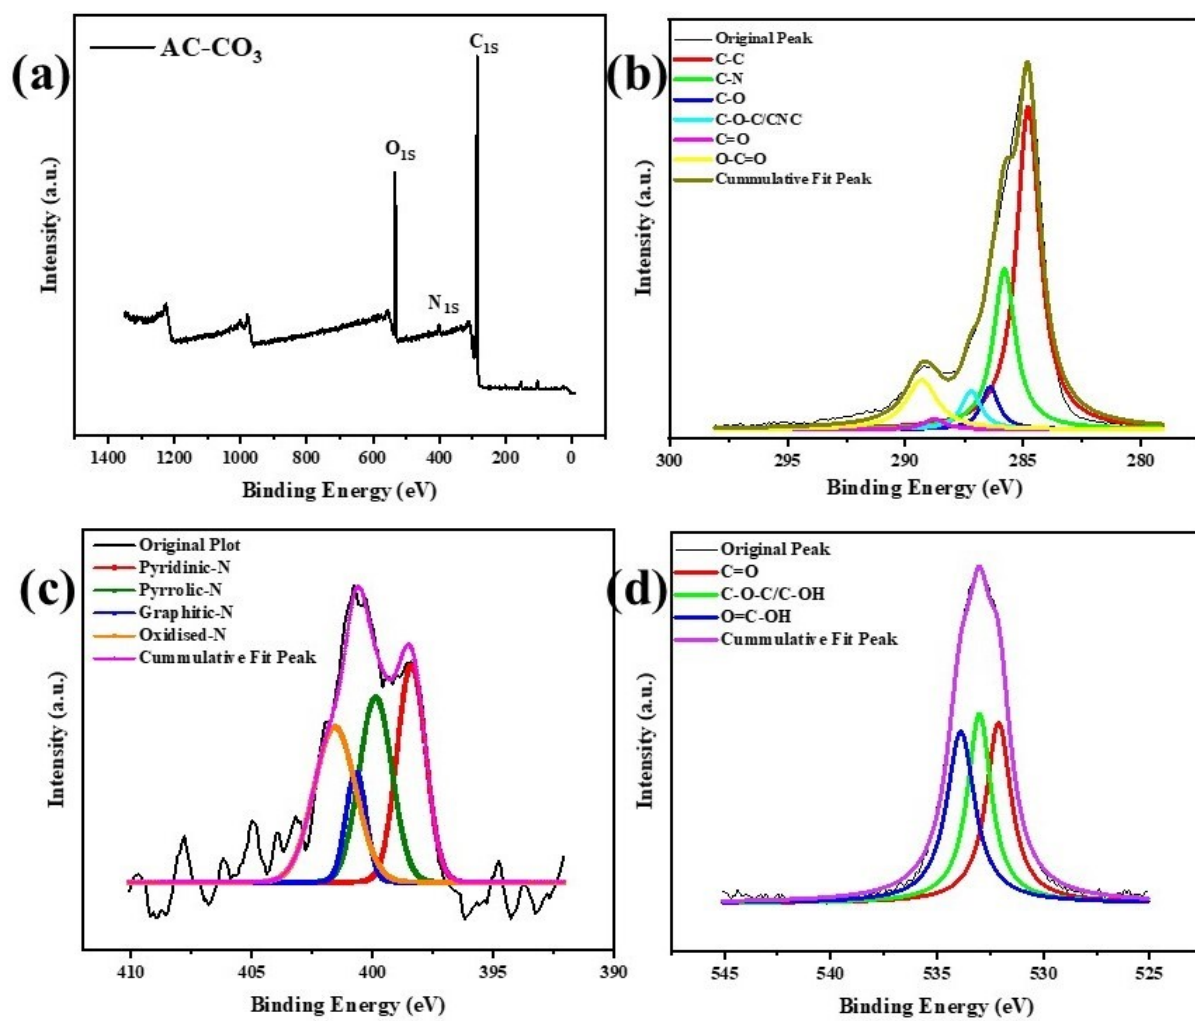

**Figure S12 :** XPS (a) survey and spectra of AC-CO<sub>3</sub> (b)C<sub>1s</sub> core level (c) N<sub>1s</sub> core level (d) O<sub>1s</sub> core level

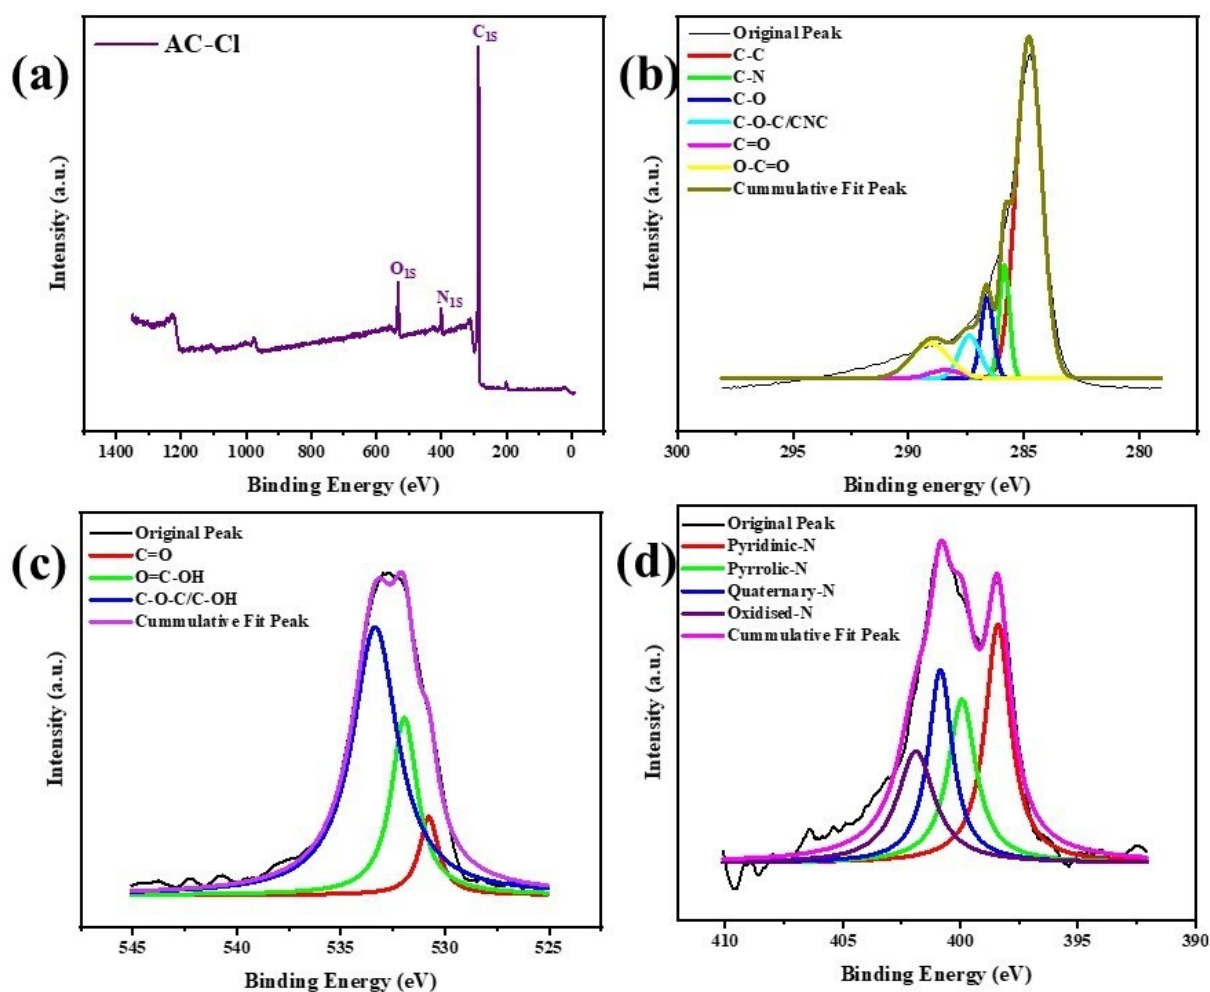

**Figure S13 :** XPS (a) survey and spectra of AC-Cl (b)  $C_{1s}$  core level (c)  $N_{1s}$  core level (d)  $O_{1s}$  core level

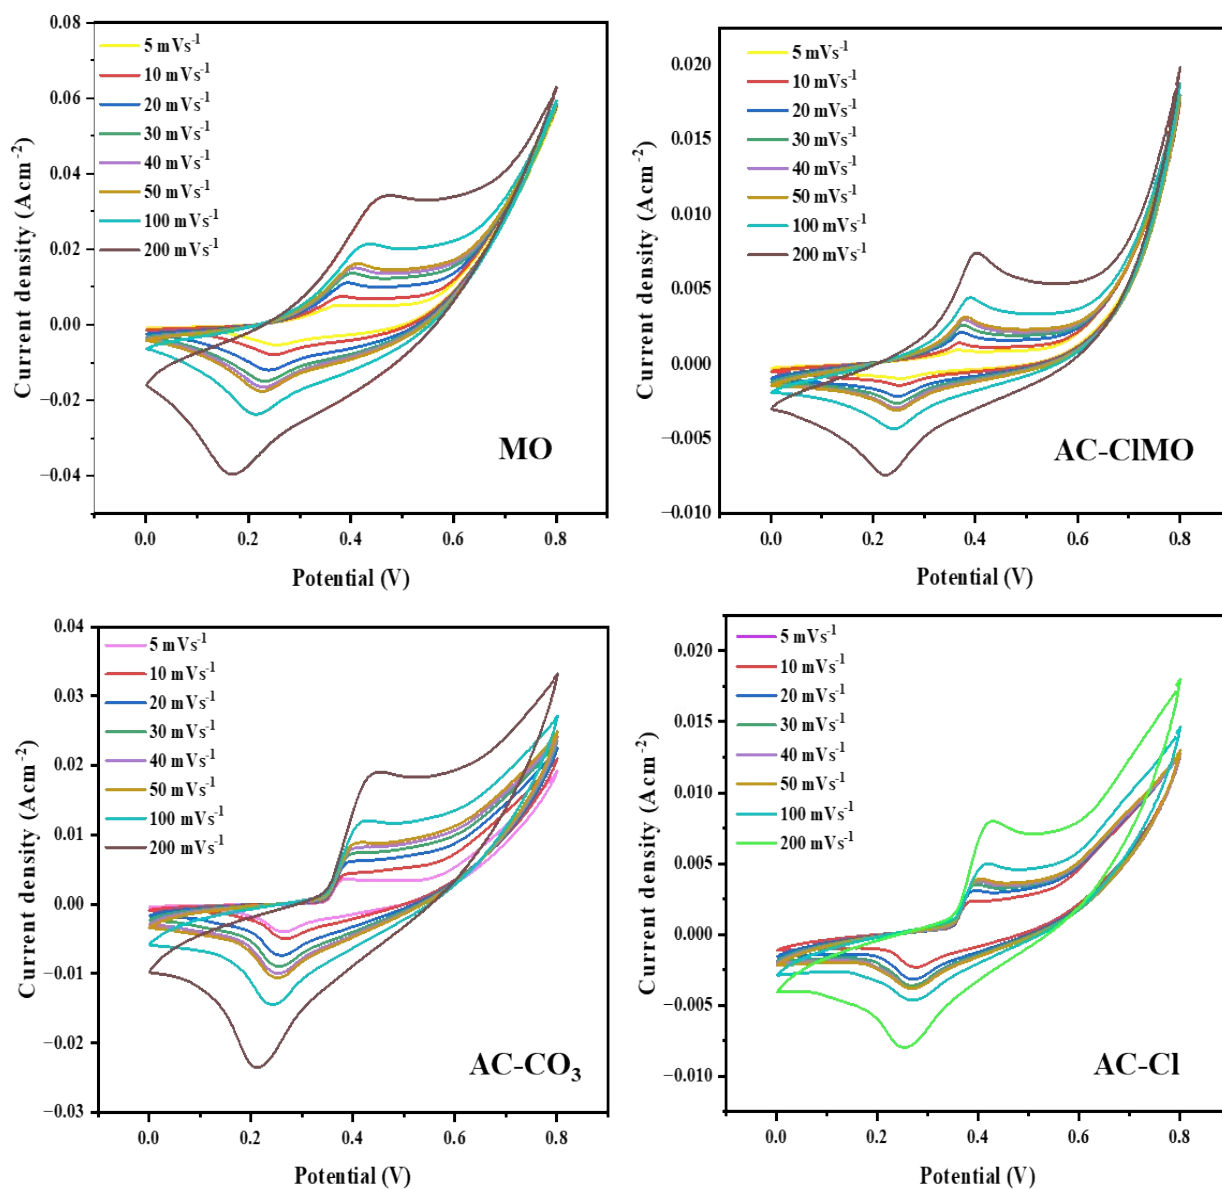

**Figure S14:** Cyclic voltammogram of (a) MO, (b) AC-CIMO, (c) AC-CO<sub>3</sub>, (d) AC-Cl at varying scan rates

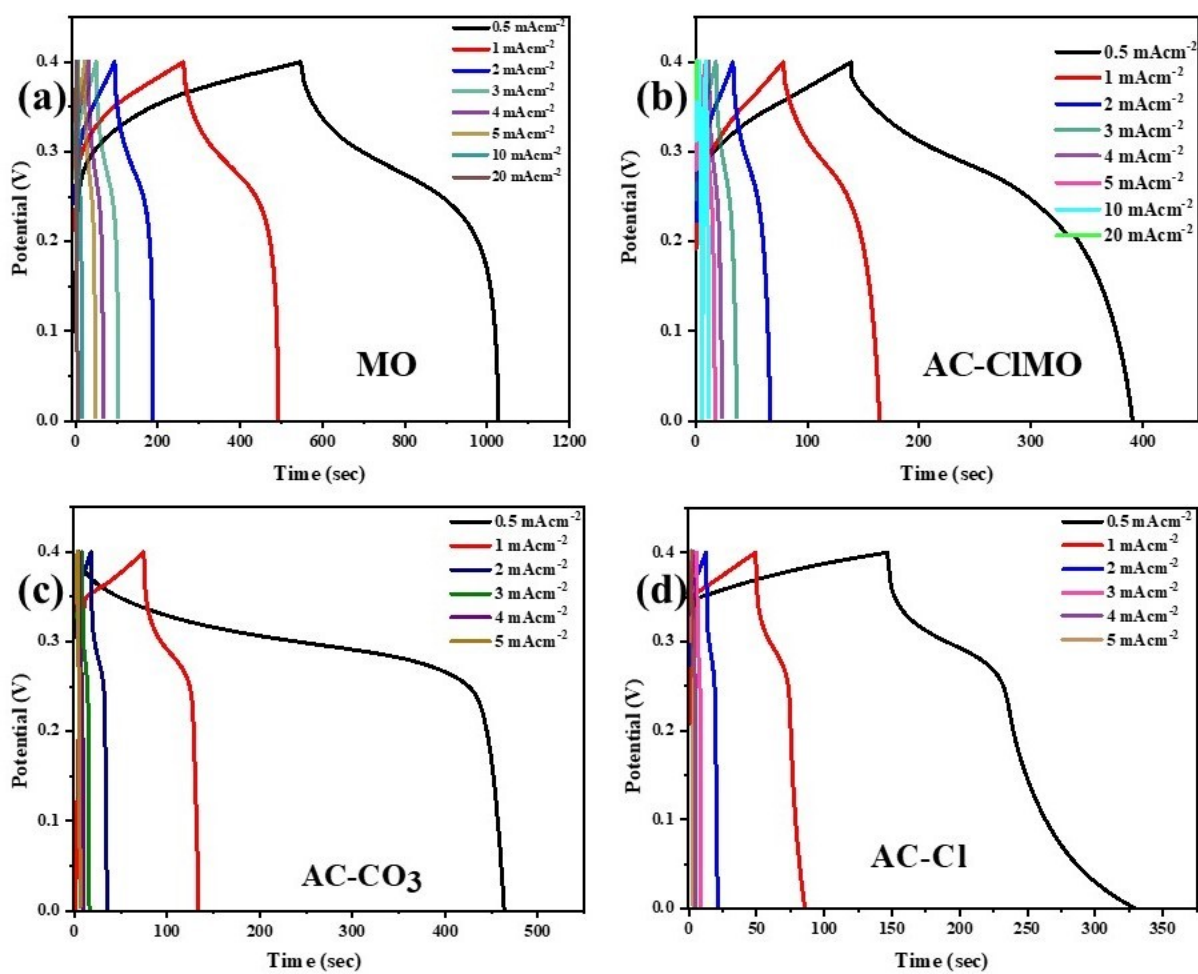

**Figure S15:** Galvanostatic charge-discharge curves of (a) MO, (b) AC-CIMO, (c) AC-CO<sub>3</sub>, (d) AC-Cl at varying scan rates

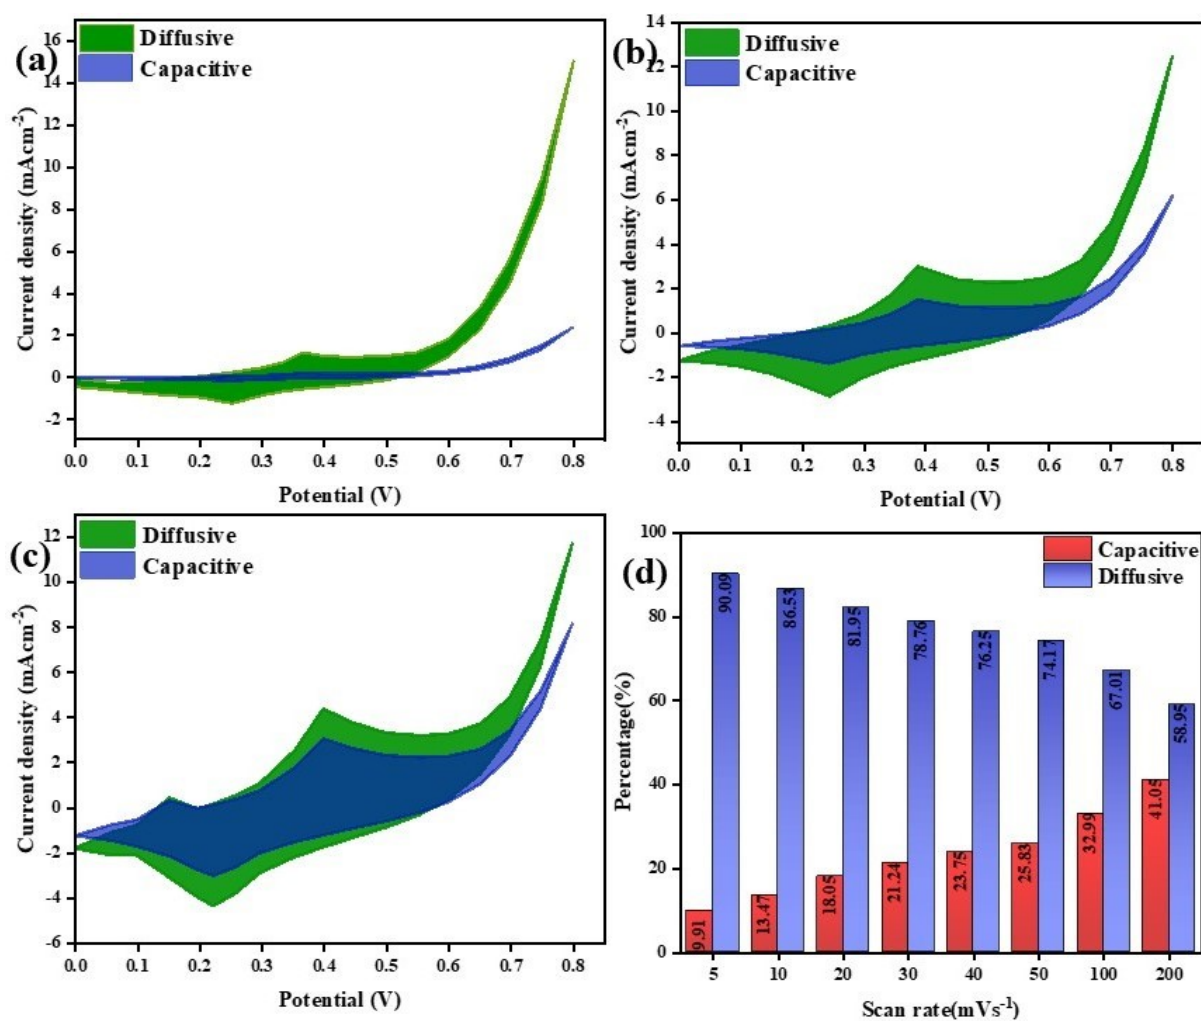

**Figure S16:** Capacitive and diffusive controlled CV curves of AC-CIMO at scan rates (a) 10mVs<sup>-1</sup>; (b) 100 mVs<sup>-1</sup>; (c) 200 mVs<sup>-1</sup>; and (d) contribution percentage graph at different scan rates of AC-CIMO.

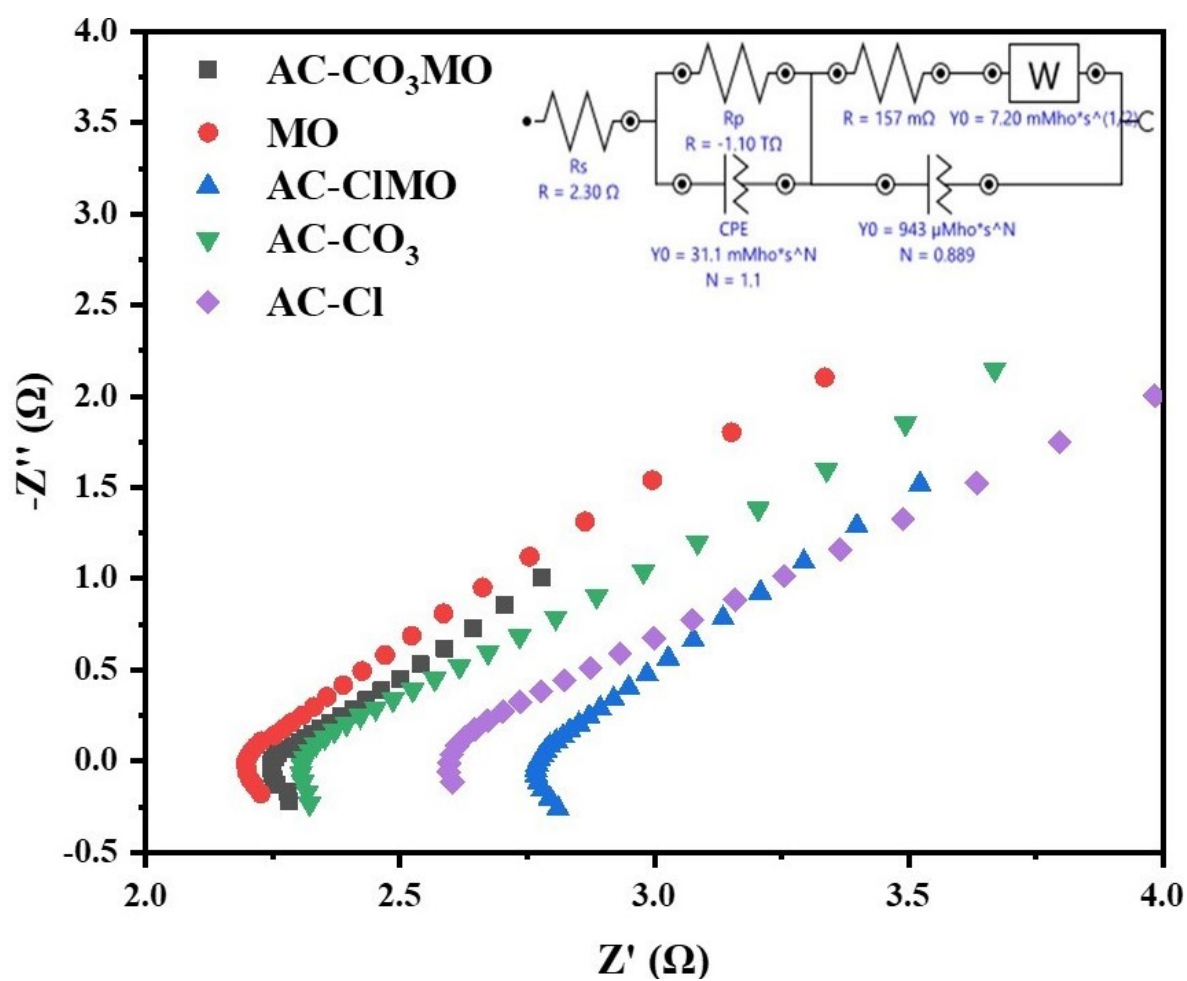

Figure S17: Magnified EIS Nyquist Plot (insight is equivalent circuit)



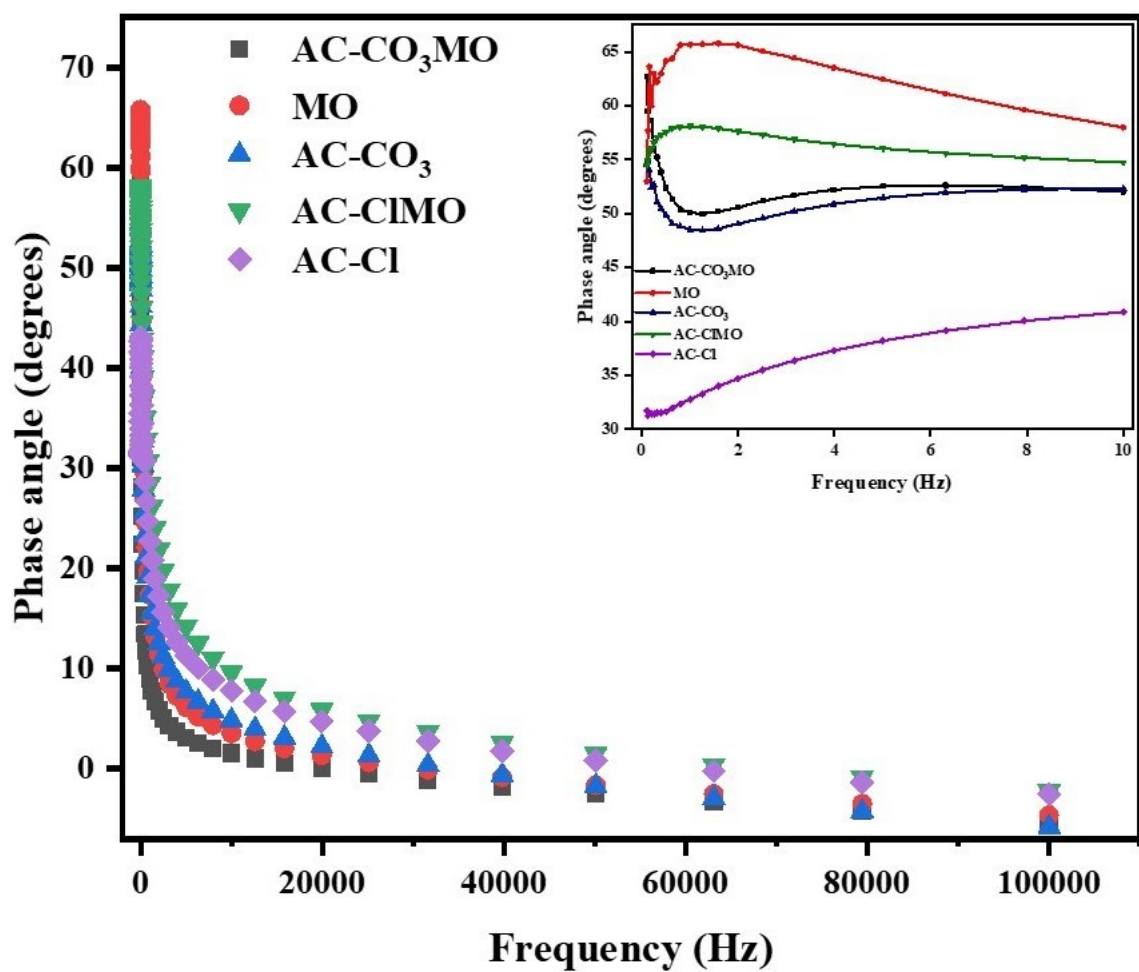

**Figure S18:** Bode Plot for Frequency vs Phase angle

**Table S1:** Ratio of  $t_{\text{discharging}}/t_{\text{charging}}$  for different synthesized electrode materials

| Electrode Materials   | $t_{\text{discharging}}/t_{\text{charging}}$ | S.D             |
|-----------------------|----------------------------------------------|-----------------|
| AC-CO <sub>3</sub> MO | 2.86                                         | $2.86 \pm 0.84$ |
| AC-CO <sub>3</sub>    | 2.51                                         | $2.51 \pm 0.84$ |
| AC-ClMO               | 1.66                                         | $1.66 \pm 0.84$ |
| AC-Cl                 | 1.22                                         | $1.22 \pm 0.84$ |
| MO                    | 0.88                                         | $0.88 \pm 0.84$ |

**Table S2:** Comparison of the capacitance of NDCs derived from different sources of biowaste

| Carbon Precursor/Electroactive Materials                                    | Chemical Activator                              | Nitrogen Source       | Electrolyte                          | Capacitance                                           | Retention/Cycles/Current Density      | Ref.             |
|-----------------------------------------------------------------------------|-------------------------------------------------|-----------------------|--------------------------------------|-------------------------------------------------------|---------------------------------------|------------------|
| Soybean curd residue                                                        | Not used                                        | Self-nitrogen         | 2(M) KOH                             | 215 Fg <sup>-1</sup> at 0.5 Ag <sup>-1</sup>          | 90% / 5000 / 5Ag <sup>-1</sup>        | [1]              |
| Shrimp shell                                                                | KOH                                             | Self-nitrogen         | 6(M) KOH                             | 348 Fg <sup>-1</sup> at 0.05 Ag <sup>-1</sup>         | 93.5% / 1000 / 1Ag <sup>-1</sup>      | [2]              |
| <i>Ascophyllum nodosum</i>                                                  | KOH                                             | N <sub>2</sub> source | 1(M) KOH                             | 207 Fg <sup>-1</sup> at 0.5 Fg <sup>-1</sup>          | 92.3% / 2500 / 5Ag <sup>-1</sup>      | [3]              |
| AC/PANI/PVA                                                                 | -                                               | -                     | 2(M) H <sub>2</sub> SO <sub>4</sub>  | 62.5 Fg <sup>-1</sup> at 0.1 Ag <sup>-1</sup>         | 84% / 3000 / 0.1 Ag <sup>-1</sup>     | [4]              |
| <i>Desmostachya bipinnata</i>                                               | KOH                                             | -                     | 6(M) KOH                             | 218 Fg <sup>-1</sup> at 0.7 Ag <sup>-1</sup>          | 85% / 5000 / 0.7 Ag <sup>-1</sup>     | [5]              |
| Potato waste                                                                | ZnCl <sub>2</sub>                               | Melamine              | 2(M) KOH                             | 255 Fg <sup>-1</sup> at 0.5 Ag <sup>-1</sup>          | 93% / 5000 / 5 Ag <sup>-1</sup>       | [6]              |
| Banana Fibres                                                               | ZnCl <sub>2</sub>                               | -                     | 1(M) Na <sub>2</sub> SO <sub>4</sub> | 74 Fg <sup>-1</sup> at 0.5 Ag <sup>-1</sup>           | 88% / 500 / 0.5 Ag <sup>-1</sup>      | [7]              |
| Borassus flabellifer Flower                                                 | H <sub>3</sub> PO <sub>4</sub>                  | -                     | 1(M) KOH                             | 238.2 Fg <sup>-1</sup> at 1 Ag <sup>-1</sup>          | 90% / 1000 / 1 Ag <sup>-1</sup>       | [8]              |
| Waste Tea Leaves                                                            | KOH                                             | -                     | 2 (M) KOH                            | 330 Fg <sup>-1</sup> at 1 Ag <sup>-1</sup>            | 92% / 2000 / 5 Ag <sup>-1</sup>       | [9]              |
| Psidium guajava                                                             | (NH <sub>4</sub> ) <sub>2</sub> CO <sub>3</sub> | Urea                  | 1(M) KOH                             | 499 mFcm <sup>-2</sup> at 0.5 mAc <sup>-2</sup>       | -                                     | This work        |
| Psidium guajava                                                             | NH <sub>4</sub> Cl                              | Urea                  | 1(M) KOH                             | 223.7 mFcm <sup>-2</sup> at 0.5 mAc <sup>-2</sup>     | -                                     | This work        |
| <b>PNDC/NiCo<sub>2</sub>O<sub>4</sub></b><br>(AC-CO <sub>3</sub> PNDC used) | -                                               | -                     | <b>1(M) KOH</b>                      | <b>761.9 mFcm<sup>-2</sup>at 0.5 mAc<sup>-2</sup></b> | <b>66% / 800/ 10 mAc<sup>-2</sup></b> | <b>This work</b> |

## References

- [1] G. Ma et al., *RSC Adv*, 2015, **5**, 83129–83138.
- [2] F. Gao et al., *J Mater Chem A Mater*, 2016, **4**, 7445–7452.
- [3] K. Y. Perez-Salcedo et al., *Journal of Porous Materials*, 2020, **27**, 959–969.
- [4] A. Olad et al., *Journal of Polymer Research*, 2016, **23**, 147,.
- [5] G. K. Gupta et al., *Nanoscale Res Lett*, 2021, **16**, 85.
- [6] G. Ma *et al.*, *Bioresour Technol*, 2015, **197**, 137–142.
- [7] V. Subramanian et al., *Journal of Physical Chemistry C*, 2007, **111**, 7527–7531.
- [8] M. Sivachidambaram et al., *New Journal of Chemistry*, 2017, **41**, 3939–3949.
- [9] C. Peng et al., *Electrochim Acta*, 2013, **87**, 401–408.
